# Supplementary material
Source: PubMed Central journal article supplement (PMC8609267)
Supplement: 41574_2021_593_MOESM1_ESM.pdf [file 41574_2021_593_MOESM1_ESM.pdf]

---

**Supplementary information**

---

**The health effects of vitamin D  
supplementation: evidence from human  
studies**

---

In the format provided by the  
authors and unedited

### **Supplementary Box 1. Overview of the recent major megatrials on vitamin D.**

The largest trial to date is the **VITAL study**<sup>1</sup> that recruited more than 25,000 adults from 44 centers in the USA (Table 1). The trial had a two-by-two factorial design to evaluate the potential benefits of vitamin D<sub>3</sub> (2000 IU/d) or omega-3 marine fatty acids (1g/d). Adult males (>50 yrs.) or females (>55 yrs.) were followed for a mean duration of 5.3 yrs. The primary end points were invasive cancer (any type) and major cardiovascular (CV) events (a composite of myocardial infarction, stroke or death from CV events). Many secondary events were also examined. The mean baseline vitamin D status (serum 25OHD concentration of 30.8±10 ng/ml) was higher than that of the average American adult (based on comparison with the latest NHANES data). The Vitamin D Assessment Study (**ViDA study**)<sup>2</sup> evaluated the effects of monthly high dose vitamin D supplementation in more than 5000 New Zealand adults followed for a mean duration of 3.3 yrs. (Table 1). Subjects were randomized to receive either placebo or a dose of 200,000 IU of vitamin D at the start of the study followed by a monthly dose of 100,000 IU (~equivalent of about 3300 IU/d). Most of the participants had a normal vitamin D status at baseline (mean serum 25OHD of 26 ng/ml). The primary aim of the **D2d study** was to evaluate the effects of a daily dose of vitamin D (4000 IU/d) for a mean duration of 2.5 yrs. on the conversion of prediabetes to type 2 diabetes mellitus<sup>3</sup>. The criteria used to define prediabetes or type 2 diabetes were in line with the American Diabetes Association guidelines. Most study participants were vitamin D replete at baseline as their mean baseline serum 25OHD concentration was about 28 ng/ml<sup>3</sup>. The DO-HEALTH study<sup>4</sup> was a complex 2x2x2 factorial RCT evaluating vitamin D (2000 IU/d), omega-3 fatty acids and strength exercise program in elderly European subjects without major comorbidities. These subjects were less vitamin D replete than in the other megatrials. The **Calgary study** is not really a megatrial as it included “only” 311 Canadian adults and intended to explore the effects and safety of daily high dose vitamin D (4000 and 10,000 IU versus 400 IU) for 3 yrs. with bone structure and quality (measured by HRpQCT)<sup>5,6</sup>.

**Supplementary Box 2. Strengths and weaknesses of Mendelian Randomization studies to evaluate the long-term risks of vitamin D deficiency on a variety of health outcomes.**

This approach has several advantages. First, genetic variants are randomly assigned at conception and this process, somewhat analogous to randomization in an RCT, breaks association with confounding factors. This is particularly helpful in the case of 25OHD, since it is associated with many factors that may confound the relationship between 25OHD and disease - such as educational attainment, body mass index (BMI) and smoking. Second, since alleles are inherited at conception, which always precedes disease onset, MR is free of bias due to reverse causation, where disease can influence 25OHD levels. This is particularly relevant since many diseases can lead individuals to stay inside more often, have less sun exposure and therefore lowered 25OHD levels. Third, MR studies can provide an assessment of the lifetime effects of lowered 25OHD levels, since alleles are inherited at conception. Despite these advantages, MR studies also have important limitations, which arise mostly from the assumptions inherent in such studies.

The first assumption is that the genetic variants are associated with 25OHD levels. This can be largely overcome by utilizing only genetic variants that have been associated at a genome-wide significant level ( $P < 5 \times 10^{-8}$ ) with 25OHD.

The second assumption is that the genetic variants are not associated with factors that confound the relationship between the exposure and the outcome. Studies that have explored the relationship between the alleles that lower 25OHD and potential confounders have demonstrated a lack of association<sup>7</sup>.

The third assumption is most problematic. In order to properly assess the effect of lowered 25OHD on disease outcomes, the alleles that influence 25OHD levels must not influence risk of disease independently of 25OHD levels. While other assumptions are required and some types of MR analyses allow for the relaxation of these assumptions, it is important to bear in mind these assumptions, as they directly affect the validity of MR studies.

A recent review<sup>8</sup> summarized the results of 38 Mendelian Randomization trials. Four MR studies of autoimmune diseases showed that subjects with genetically lower serum 25OHD concentrations (throughout life) had a significantly higher risk for multiple sclerosis. The results of newer MR will be discussed later according to the type of disease studied.

MR studies have strengths that cannot be replicated by RCTs as they estimate the effect of lifelong differences in vitamin D status based on allelic variants. They also have limitations as most polymorphisms could, in combination, only predict less than 5% variation in serum 25OHD level and cannot detect non-linear effects. However, this low variance explained does not impact the validity of the results, but rather influences the statistical power of such studies. This statistical power can be best assessed by examining the 95% confidence intervals of the effect estimates. If these confidence intervals exclude clinically relevant effects, then the null findings are likely to be clinically meaningful. Nevertheless, the discovery of new polymorphisms has recently increased the predictability of serum 25OHD into the 10% range, more than double in comparison with the original polymorphisms found in 4 genes canonical to the vitamin D synthesis, transport and metabolism pathways<sup>9,10</sup>. Therefore, it is likely that in the near future new disease outcomes will be re-evaluated with greater statistical power to detect the potential lifelong effects of differences in vitamin D status.

**Supplementary Box 3: vitamin D status and type 2 diabetes mellitus: Evidence from Mendelian randomization:**

| Study                    | Genetic Instruments                          | No/No of Events      | Outcomes                   | Estimate of effect (95% CI) | P value               | Unit of estimated effect                                               |                       |      |                                                                    |
|--------------------------|----------------------------------------------|----------------------|----------------------------|-----------------------------|-----------------------|------------------------------------------------------------------------|-----------------------|------|--------------------------------------------------------------------|
| Ye 2015 <sup>11</sup>    | <i>CYP2R1, DHCR7, DBP and CYP24A1</i>        | 104 488/28 144       | T2D                        | 1.01 (0.75, 1.36)           | 0.94                  | 1 SD decrease in 25OHD level                                           |                       |      |                                                                    |
|                          |                                              | 46 368               | Fasting glucose            | -0.02 (-0.04, 0.01)         | 0.28                  | mmol/L per SD decrease in 25OHD level                                  |                       |      |                                                                    |
|                          |                                              | 46 368               | 2-h glucose                | 0.08 (-0.06, 0.22)          | 0.25                  | mmol/L per SD decrease in 25OHD level                                  |                       |      |                                                                    |
|                          |                                              | 46 368               | Fasting insulin            | -1.04 (-3.91, 1.83)         | 0.48                  | % difference per SD decrease in 25OHD level                            |                       |      |                                                                    |
| 46 368                   |                                              |                      | HbA1c                      | 0.01 (-0.04, 0.05)          | 0.80                  | % difference per SD decrease in 25OHD level                            |                       |      |                                                                    |
|                          |                                              |                      | Lu 2018 <sup>12</sup>      | DHCR7, CYP2R1               | 58 312/370 592        | Diabetes                                                               | 0.86 (0.77, 0.97)     | 0.01 | 25 nmol/L high 25OHD as determined by genetic variants             |
|                          |                                              |                      | DHCR7, CYP2R1, GC, CYP24A1 | 32 796/248 629              | Diabetes              | 0.92 (0.84, 1.01)                                                      | 0.07                  |      |                                                                    |
|                          |                                              |                      | Chen 2019 <sup>13</sup>    | DHCR7, CYP2R1, GC, CYP24A1  | 10 655 Chinese adults | Fasting plasma glucose                                                 | -0.186(-0.399, 0.026) |      | per 10 nmol/L GRS synthesis determined increase of 25(OH) D levels |
| Yuan 2019 <sup>14</sup>  | CYP2R1, DHCR7, CYP24A1, SEC23A, and AMDHD1   | 898 130/74 124       | T2D                        | 0.94 (0.88, 0.99)           | 0.03                  | 1 SD increment of serum 25OHD levels                                   |                       |      |                                                                    |
| Meng 2019 <sup>15</sup>  | CYP2R1, DHCR7, CYP24A1, SEC23A, and AMDHD1   | 339 256/15 958       | T2D                        | 0.97 (0.85,1.12)            | 0.62                  | 1 SD increase of the log-transformed 25(OH)D level                     |                       |      |                                                                    |
| Wang 2020 <sup>16</sup>  | DHCR7, CYP2R1, GC, and CYP24A1               | 14 570/3 915 Chinese | prediabetes                | 0.982 (0.948, 1.016)        |                       | 1 unit increase in the natural-log-transformed vitamin D level         |                       |      |                                                                    |
|                          |                                              | 12 220/1 565 Chinese | T2D                        | 0.985 (0.940, 1.032)        |                       |                                                                        |                       |      |                                                                    |
|                          |                                              | 16 135 Chinese       | Fasting plasma glucose     | - 0.015 (- 0.035, 0.006)    |                       |                                                                        |                       |      |                                                                    |
|                          |                                              | 16 135 Chinese       | hbA1c                      | - 0.003 (- 0.017, 0.011)    |                       |                                                                        |                       |      |                                                                    |
| Revez 2020 <sup>10</sup> | 165 25OHD SNPs - Conditioned on BMI (mtCOJO) |                      | Type II Diabetes           | -0.02 (-0.08,0.03)          | 0.44                  | per unit increase in rank-based inverse-normal transformed 25OHD level |                       |      |                                                                    |

|                                       |                  |                     |      |
|---------------------------------------|------------------|---------------------|------|
| 155 25OHD SNPs- No adjustment for BMI | Type II Diabetes | -0.04 (-0.09,0.02)  | 0.20 |
|                                       | Type II Diabetes | -0.004 (-0.06,0.05) | 0.88 |
| 161 25OHD SNPs-With BMI covariate     |                  |                     |      |

Since 2015, 5 large MR studies investigated the causal effect of genetically altered 25OHD levels on risk of T2DM and related traits (Table 2). In the earliest study<sup>11</sup>, instruments to infer 25OHD levels were four SNPs within or near genes related to 25OHD synthesis and metabolism (*DHCR7*-rs12785878, related to vitamin D synthesis; *CYP2R1*-rs10741657, the hepatic 25-hydroxylase; *GC/DBP* -rs2282679 involved in 25OHD transport; and *CYP24A1*-rs6013897 involved in catabolism), explaining 2.4% of the variance in 25OHD levels. Each SNP was assessed for association with risk of T2DM in 28,144 cases and 76,344 controls of European descent, and with glycemic traits among 46,368 individuals. These associations were then combined to estimate the causal association of 25OHD concentration with the above outcomes. The MR OR for T2DM was 1.01 (95% CI 0.75, 1.36) per 25 nmol/L (equivalent to 1 SD) lower 25OHD concentration. The MR-derived 95% confidence intervals for estimates for glycemic traits also included the null. In another MR study<sup>12</sup> using 4 SNPs in the same vitamin D genes, the authors studied the association of these SNPs with T2DM in a meta-analysis totaling 32,796 T2DM cases of European and Chinese ancestry. A 25 nmol/l higher genetically instrumented 25OHD concentration was associated with an MR OR of 0.86 (95% CI 0.77, 0.97) for T2DM using the 2 synthesis SNPs. An equivalent difference in 25OHD using all 4 SNPs was not associated with T2DM. These discordant results are difficult to interpret, but the absence of causal association based on the 4 SNP- score is notable, given that the 4 SNPs explain a larger portion of the variance in 25OHD levels. In 2019, a large MR study<sup>15</sup> investigated associations of 25OHD levels and multiple traits in 339,256 White British from UK Biobank, among which T2DM status. In this study, 6 SNPs were used as instruments to infer 25OHD levels, including the 4 previous SNPs and two newly identified SNPs in *SEC23A* and *AMDHDI*, both genes without clear role in the vitamin D metabolic pathway. These 6 SNPs explain ~5.3% of the variance in 25OHD levels. This substantially powered MR analysis identified no change in the odds of T2DM per SD increase in the log-transformed 25OHD level. An MR analysis on an even larger population of 898,130 Europeans<sup>14</sup> (74,124 T2DM cases) used SNPs in the same 6 vitamin D genes, and a low-frequency variant in *CYP2R1* (rs10741657). They demonstrated that for 1 SD increment of 25OHD levels, the resultant MR OR for T2DM was

0.94 (95% CI 0.88, 0.99). Finally, a recent MR study <sup>17</sup> used up to 285 25OHD-related SNPs, explaining more than 10.5% of the variance in 25OHD levels, to investigate the causal role of vitamin D in multiple outcomes in 417,580 White British from UK Biobank. Using sensitivity analyses excluding SNPs with possible pleiotropic effects, and adjusting, or not, for BMI, this MR analysis did not support an association between lowered 25OHD levels and T2DM (all MR ORs between 0.96 and 1.05, with tight 95% CI including the 1).

In non-European, an MR study <sup>16</sup> used 4 SNPs in *DHCR7*, *CYP2R1*, *GC* and *CYP24A1* and included up to 16,135 genotyped Chinese subjects with information on T2DM status and glycemic traits. The MR ORs for risk of T2DM (in 1,565 cases and 10,655 controls) and prediabetes (amongst 3,915 cases and 10,655 controls) were 0.99 (95% CI 0.94, 1.03) and 0.98 (95% CI 0.95, 1.02), respectively. The MR-derived estimates for fasting plasma glucose and HbA<sub>1c</sub> were also not significant.

#### Supplementary Box 4: Effects of vitamin D supplementation on cancer mortality

| Author                               | N<br>Age       | Baseline<br>25OHD<br>(ng/ml) | Final*<br>25OHD<br>(ng/ml)   | Daily dose<br>(equivalent)<br>(IU)                                       | Duration<br>(yrs.) | comments                                                                                          | Cancer incidence                                                                                                                                                                       | Cancer mortality                                                                                                                                                                                        |
|--------------------------------------|----------------|------------------------------|------------------------------|--------------------------------------------------------------------------|--------------------|---------------------------------------------------------------------------------------------------|----------------------------------------------------------------------------------------------------------------------------------------------------------------------------------------|---------------------------------------------------------------------------------------------------------------------------------------------------------------------------------------------------------|
| Manson <sup>1</sup>                  | 25,871<br>67   | 31                           | 42                           | 2,000                                                                    | 5.3                | Primary outcome:<br>invasive cancer of any<br>type                                                | <u>Overall</u><br>Placebo: 824<br>D <sub>3</sub> : 793<br>→HR 0.96 (NS)<br><u>After exclusion of first 2yrs<br/>follow-up</u><br>Placebo: 528<br>D <sub>3</sub> : 429<br>→HR 0.94 (NS) | <u>Overall</u><br>Placebo: 187<br>D <sub>3</sub> : 154<br>→HR 0.83 (0.67-1.02)<br><u>After exclusion of first 2<br/>yrs. follow-up</u><br>Placebo: 149<br>D <sub>3</sub> : 112<br>→HR 0.75 (0.59-0.96)* |
| Scragg <sup>18</sup>                 | 5,108<br>66    | 25                           | 48-54                        | One loading<br>dose of 200,000<br>IU and then<br>10,000/m<br>≈3.300 IU/d | 3.3                | Primary invasive and<br>in situ malignant<br>neoplasms (excluding<br>non-melanoma skin<br>cancer) | Placebo: 6.4%<br>D <sub>3</sub> : 6.3%<br>→HR 1.01 (NS)                                                                                                                                | Placebo: 45<br>D <sub>3</sub> : 44<br>→RR 0.97 (NS)                                                                                                                                                     |
| Avenell<br>(RECORD)<br><sup>19</sup> | 5,292<br>77    | 16                           | 25                           | 800 IU + 1g Ca                                                           | 2-5                |                                                                                                   | <u>Overall</u><br>Placebo: 315<br>D <sub>3</sub> : 338<br>→HR 1.07 (NS)                                                                                                                | Placebo: 178<br>D <sub>3</sub> : 151<br>→RR 0.85 (0.68-1.06)                                                                                                                                            |
| Wactawski<br>Wende <sup>20</sup>     | 36,282<br>62   | 17                           | 21                           | 400 IU + 1g Ca                                                           | 7                  | Postmenopausal<br>women; incidence of<br>colorectal, breast or<br>overall invasive<br>cancer      | Overall study<br>colorectal cancer<br>→HR 1.08 (NS)<br>subjects with baseline 25OHD <<br>12 ng/ml<br>→HR 0.75 (0.39-1.48)<br>Overall cancer incidence<br>→RR 1.09 (NS)                 | Death from colorectal<br>cancer<br>→HR 0.82 (0.52-1.29)                                                                                                                                                 |
| Trivedi <sup>21</sup>                | 2,686<br>65-85 | NA                           | 30<br>(vs 21 in<br>controls) | 100,000 IU/4m<br>≈833 IU /d                                              | 5                  |                                                                                                   |                                                                                                                                                                                        | Overall cancer mortality<br>Placebo: 72<br>D <sub>3</sub> : 63<br>→RR 0.86 (0.61-1.20)                                                                                                                  |

\*Final 25OHD concentration in vitamin D supplemented group. Modified from Keum et al <sup>22</sup> and Manson et al <sup>23</sup>.



**Supplementary Box 5: vitamin D status and cancer: Evidence from Mendelian randomization:**

| Study                              | Genetic Instruments                               | No/No of Events    | Outcomes                         | Estimate of effect (95% CI) | P value | Unit of estimated effect                                             |
|------------------------------------|---------------------------------------------------|--------------------|----------------------------------|-----------------------------|---------|----------------------------------------------------------------------|
| Ong 2016 <sup>24</sup>             | <i>DHCR7, CYP2R1</i> and <i>GC</i>                | 31 719/10 065      | All ovarian cancer               | 1.27 (1.06, 1.51)           | NA      | 20 nmol/L lower 25OHD                                                |
|                                    |                                                   | 31 15/86           | Serous subtype of ovarian cancer | 1.54 (1.19, 2.01)           | NA      |                                                                      |
| Theodoratou 2012 <sup>25</sup>     | <i>DHCR7, CYP2R1, GC, and CYP24A1</i>             | 4238/2001          | Colorectal cancer                | 1.16 (0.60, 2.23)           | NA      | per unit increase in log 25OHD level                                 |
| Dudding 2018 <sup>26</sup>         | <i>GC, CYP2R1, DHCR7, CYP24A1, PDE3B</i>          | 5 133/5 984        | Oral cancer                      | 0.86 (0.68, 1.09)           | 0.22    | per standard deviation increase in log transformed 25OHD             |
| Chandler 2018 <sup>27</sup>        | <i>DHCR7, CYP2R1, GC</i>                          | 3 985/23 294 women | Incident total cancer            | 1.10 (0.96, 1.25)           | 0.17    | 20 nmol/L higher 25OHD level as determined by genetic variants       |
|                                    |                                                   | 1 560              | Incident breast cancer           | 1.14 (0.92, 1.41)           | 0.22    | NA                                                                   |
|                                    |                                                   | 329                | Incident colorectal cancer       | 1.54 (0.96, 2.46)           | 0.07    | NA                                                                   |
|                                    |                                                   | 330                | Incident lung cancer             | 0.96 (0.55, 1.68)           | 0.89    | NA                                                                   |
|                                    |                                                   | 770                | Total cancer death               | 0.98 (0.73, 1.32)           | 0.90    | NA                                                                   |
| Dimitrakopoulou 2017 <sup>28</sup> | <i>DHCR7, CYP2R1, GC, CYP24A1</i>                 | 11 488             | Colorectal cancer                | 0.92 (0.76, 1.10)           | 0.36    | per 25 nmol/L increase in genetically determined 25OHD level         |
|                                    |                                                   | 15 748             | Breast cancer                    | 1.05 (0.89, 1.24)           | 0.59    |                                                                      |
|                                    |                                                   | 22 898             | Prostate cancer                  | 0.89 (0.77, 1.02)           | 0.08    |                                                                      |
|                                    |                                                   | 4 369              | Ovarian cancer                   | 1.12 (0.86, 1.47)           | 0.40    |                                                                      |
|                                    |                                                   | 12 537             | Lung cancer                      | 1.03 (0.87, 1.23)           | 0.72    |                                                                      |
|                                    |                                                   | 1 896              | Pancreatic cancer                | 1.36 (0.81, 2.27)           | 0.25    |                                                                      |
| Sun 2018 <sup>29</sup>             | <i>GC, DHCR7</i> and <i>CYP2R1</i>                | 54 580 /676        | Lung cancer                      | 0.96 (0.54, 1.69)           | 0.88    | 25 nmol/L increase in 25OHD                                          |
|                                    |                                                   | 1 627              | Neuroblastoma cancer             | 0.76 (0.47, 1.21)           | 0.24    |                                                                      |
| Ong 2018 <sup>30</sup>             | <i>GC, CYP2R1, DHCR7, and CYP24A1</i>             | 438 870/46 155     | Cancer                           | 0.97 (0.91, 1.04)           | 0.40    | 20 nmol/L increase in 25OHD                                          |
|                                    |                                                   | 438 870/6 998      | Cancer mortality                 | 0.97 (0.84, 1.11)           | 0.54    |                                                                      |
| He 2018 <sup>31</sup>              | <i>DHCR7, CYP2R1, GC, CYP24A1, SEC23A, AMDHD1</i> | 48 168/18 967      | Colorectal cancer                | 0.91 (0.69, 1.19)           | 0.48    | per unit log transformed 25OHD change determined by genetic variants |

|                             |                                               |               |                           |                   |      |                                                                |
|-----------------------------|-----------------------------------------------|---------------|---------------------------|-------------------|------|----------------------------------------------------------------|
| Winslow 2018 <sup>32</sup>  | DHCR7, CYP2R1                                 | 1 569/103 084 | Non-melanoma skin cancer  | 1.11 (0.91, 1.35) | NA   | 20 nmol/L higher 25OHD level as determined by genetic variants |
| Dong 2019 <sup>33</sup>     | GC,CYP2R1, DHCR7, CYP24A1, SEC23A, and AMDHD1 | 23 326/6 167  | Esophageal adenocarcinoma | 0.68 (0.39,1.19)  | 0.18 | 20 nmol/L increase in 25OHD                                    |
|                             |                                               | 23 326/4 112  | Barrett's esophagus       | 1.21 (0.77,1.92)  | 0.41 |                                                                |
| Liyanage 2020 <sup>34</sup> | DHCR7, CYP2R1, GC, and CYP24A1                | 36 077/12 874 | melanoma                  | 1.06 (0.95-1.19)  |      | 20 nmol L-1 decrease in 25(OH)D                                |
| Jiang 2019 <sup>35</sup>    | CYP2R1, DHCR7, CYP24A1, SEC23A, and AMDHD1    | 122 977       | breast cancer             | 1.02 ( 0.97-1.08) | 0.47 | Per 25 nmol/L increase in 25OHD                                |
|                             |                                               | 79 148        | prostate cancer           | 1.00 (0.93-1.07)  | 0.99 |                                                                |

The Ovarian Cancer Association (OCA) Consortium (10,065 cases, 21,654 controls) <sup>24</sup>, reported a 27% increase in the risk of **epithelial ovarian cancer** per 20 nmol/L decrease in genetically determined 25OHD serum concentration (OR=1.27 95%CI: 1.06 to 1.51). However, the results were not corroborated by Dimitrakopoulou et al <sup>28</sup> (4,369 cases, 84,418 controls) which reported a non-significant OR of 1.12 (95% CI:0.86 to 1.47) per 25 nmol/L increase in genetically determined 25OHD levels. The discrepancy could be result of the difference in power between the studies as well as the different source of the effect estimates of the association between the SNP and 25OHD concentrations. The study by Dimitrakopoulos et al also showed no evidence of an association between genetically determined 25OHD concentrations and risk of **colorectal** (OR=0.92 95%CI: 0.76 to 1.10), **breast** (OR=1.05 95%CI: 0.89 to 1.24), **prostate** (OR=0.89 95%CI: 0.77-1.02), **lung** (OR=1.03 95%CI: 0.87 to 1.23), **pancreatic** (OR=1.36, 95%CI: 0.81-2.27) and **neuroblastoma** (OR=0.76 95%CI: 0.47 to 1.21) cancer. Similar findings were reported by Chandler et al <sup>27</sup> in relation with total incident cancer (n=3,985, OR=1.10 95%CI: 0.96 to 1.25) and cancer subtypes such as **breast** (n=1,560, OR=1.14 95%CI 0.92–1.41), **colorectal** (n=329, OR=1.54 95%CI:0.96–2.46), and **lung** (n=330, OR=0.96 95%CI: 0.55to 1.68) cancer in 23,294 women. The null effect on colorectal carcinoma was confirmed by He et al <sup>31</sup> after including two additional SNPs. Similarly, a large-scale two sample MR study (breast cancer cases = 122,977 and prostate cancer cases=79,148) did not show an effect of 25OHD concentrations on breast and prostate cancer risk (Table 3). Dong et al <sup>33</sup> demonstrated that 25OHD concentrations were also not associated with the risk of esophageal adenocarcinoma. Finally,

the OR per 20 nmol/L increase in genetically estimated 25OHD concentration was 1.11 (95%:0.91 to 1.35) for non-melanoma skin cancer <sup>32</sup> and 0.94 (95%:0.87 to 1.05) for melanoma.

**Supplementary Box 6: vitamin D status and health outcomes other than type 2 diabetes mellitus, cancer and multiple sclerosis: Evidence from Mendelian randomization:**

| Study                        | Genetic Instruments                                           | No/No of Events | Outcomes                    | Estimate of effect (95% CI) | P value | Unit of estimated effect                                     |
|------------------------------|---------------------------------------------------------------|-----------------|-----------------------------|-----------------------------|---------|--------------------------------------------------------------|
| Vim 2014 <sup>36</sup>       | <i>CYP2R1</i> and <i>DHCR7</i>                                | 146 581         | SBP                         | -0.37 (-0.73, 0.003)        | 0.05    | mm Hg per 10% increase in 25OHD level                        |
|                              |                                                               | 142 255         | DBP                         | -0.29 (-0.52, -0.07)        | 0.01    | mm Hg per 10% increase in 25OHD level                        |
|                              |                                                               | 142 255         | Risk of hypertension        | 0.92 (0.87, 0.97)           | 0.00    | per 10% increase in 25OHD level                              |
| Manousaki 2016 <sup>37</sup> | <i>DHCR7</i> , <i>CYP2R1</i> , <i>GC</i> , and <i>CYP24A1</i> | 86 995/22 233   | Coronary artery disease     | 0.99 (0.84, 1.17)           | 0.93    | 1 SD decrease in log-transformed 25OHD level                 |
| Afzal 2014 <sup>38</sup>     | <i>DHCR7</i> and <i>CYP2R1</i>                                | 95 766/10 349   | All-cause mortality         | 1.3 (1.05, 1.61)            | NA      | 20 nmol/L lower 25OHD                                        |
|                              |                                                               | 95 23/97        | Cardiovascular mortality    | 0.77 (0.55, 1.08)           | NA      |                                                              |
|                              |                                                               | 95 17/63        | Cancer mortality            | 1.43 (1.02, 1.99)           | NA      |                                                              |
|                              |                                                               | 95 8/27         | Other mortality             | 1.44 (1.01, 2.04)           | NA      |                                                              |
| Li 2016 <sup>39</sup>        | <i>DHCR7</i> , <i>CYP2R1</i> , <i>GC</i> , and <i>CYP24A1</i> | 1824            | Lumar 1-4 BMD               | -0.048 (-0.158, 0.062)      | 0.38    | g/cm <sup>2</sup> per unit increase in log-transformed 25OHD |
|                              |                                                               | 1824            | Femoral neck BMD            | -0.044 (-0.120, 0.032)      | 0.26    | g/cm <sup>2</sup> per unit increase in log-transformed 25OHD |
|                              |                                                               | 1824            | Total hip BMD               | -0.041 (-0.123, 0.041)      | 0.33    | g/cm <sup>2</sup> per unit increase in log-transformed 25OHD |
|                              |                                                               | 1824            | PTH                         | 0.088 (-0.034, 0.210)       | 0.15    | pg/mL per unit increase in log-transformed 25OHD             |
|                              |                                                               | 1824            | P1NP                        | -0.099 (-0.291, 0.093)      | 0.31    | g/L per unit increase in log-transformed 25OHD               |
| Hysinger 2016 <sup>40</sup>  | <i>CYP2R1</i> and <i>GC</i>                                   | 5080/1203       | Paediatric asthma           | -0.0000351 (NA, NA)         | 0.85    | NA                                                           |
|                              |                                                               | NA              | Severe asthma exacerbations | -0.00833 (NA, NA)           | 0.86    | NA                                                           |
| Ooi 2014 <sup>41</sup>       | <i>DHCR7</i> and <i>CYP2R1</i>                                | 79 743          | Remnant cholesterol         | 4.0 (-2.4, 11)              | 0.22    | % per 50% decrease in 25OHD level                            |
|                              |                                                               | 79 812          | LDL cholesterol             | 2.2 (-1.7, 6.2)             | 0.28    |                                                              |
|                              |                                                               | 85 363          | HDL cholesterol             | -6.0 (-10, -2.3)            | 0.00    |                                                              |
| Larsson 2018 <sup>42</sup>   |                                                               | 32 965          | Femoral neck BMD            | 0.02 (-0.03, 0.07)          | 0.37    |                                                              |

|                                  |                                            |                   |                                          |                                            |              |                                                                    |
|----------------------------------|--------------------------------------------|-------------------|------------------------------------------|--------------------------------------------|--------------|--------------------------------------------------------------------|
|                                  | DHCR7, CYP2R1, GC, CYP24A1                 | 32 965<br>142 487 | Lumbar spine BMD<br>Estimated BMD        | 0.02 (-0.04, 0.08)<br>-0.03 (-0.05, -0.01) | 0.49<br>0.02 | 1 SD increment of 25(OH)D determined by genetic variants           |
| Sun 2019 <sup>43</sup>           | DHCR7, CYP2R1, GC, CYP24A1, SEC23A, AMDHD1 | 66 628            | Total body BMD                           | 0.92 (0.82, 1.04)                          | 0.17         | NA                                                                 |
| Aspelund 2019 <sup>44</sup>      | DHCR7, CYP2R1                              | 10 501/4 003      | All-cause mortality                      | 1.32 (0.80, 2.24)                          | NA           | per 20 nmol/L decrease in genetically determined 25OHD level<br>NA |
|                                  |                                            | 10 501/4 003      | All-cause mortality                      | 1.35 (0.81, 2.37)                          | NA           |                                                                    |
| Gianfrancesco 2017 <sup>45</sup> | GC, CYP2R1, DHCR7                          | 17 15/34          | Paediatric onset multiple sclerosis      | 0.72 (0.55, 0.94)                          | 0.02         | NA                                                                 |
| Manousaki 2017 <sup>46</sup>     | GC, CYP2R1, DHCR7, and CYP24A1             | 146 761/25 109    | Asthma                                   | 1.03 (0.90,1.19)                           | 0.63         | 1 SD decrease in log-transformed 25OHD level                       |
|                                  |                                            | 15 008/7 047      | Childhood onset asthma                   | 0.95 (0.69,1.31)                           | 0.76         |                                                                    |
|                                  |                                            | 40 835/10 788     | Atopic dermatitis                        | 1.12 (0.92,1.37)                           | 0.27         |                                                                    |
|                                  |                                            | 12 853            | Elevated IgE level                       | -0.40 ( -1.65,0.85)                        | 0.54         |                                                                    |
| Bae 2018 <sup>47</sup>           | SSTR4, GC, and NADSYN1                     | 4 744/2 104       | Systemic lupus erythematosus             | 0.032 (-0.201,0.265)                       | 0.79         | NA                                                                 |
|                                  |                                            | 41 282/12 307     | Rheumatoid arthritis                     | 0.026 (-0.094,0.146)                       | 0.66         | NA                                                                 |
| Magnus 2018 <sup>48</sup>        | GC, CYP2R1, DHCR7, and CYP24A1             | 9 447<br>9 447    | Gestational hypertension<br>Preeclampsia | 0.90 (0.78,1.03)<br>0.98 (0.89,1.07)       | NA<br>NA     | 10% decrease in 25OHD                                              |
| Lund-Nielsen 2018 <sup>49</sup>  | CYP2R1, DHCR7, CYP24A1, SEC23A, and AMDHD1 | 115 16/95         | Crohn disease                            | 0.98 (0.94 ,1.03)                          | NA           | 1.4-nmol/L increase in 25OHD                                       |
|                                  |                                            | 115 110/1 265     | Ulcerative colitis                       | 1.01 (0.97,1.05)                           | NA           | 1.4-nmol/L increase in 25OHD                                       |
| Mai 2019 <sup>50</sup>           | GC, CYP2R1, DHCR7, and CYP24A1             | 56 435            | High-density lipoprotein                 | 2.52 (0.79,4.25)                           | 0.00         | 25 nmol/L increase in 25(OH)D                                      |
|                                  |                                            | 56 435            | Total cholesterol                        | 0.60 (- 0.73,1.94)                         | 0.38         |                                                                    |
|                                  |                                            | 56 435            | Non-HDL cholesterol                      | - 2.74 ( - 6.16, 0.67)                     | 0.96         |                                                                    |
| Trajanoska 2018 <sup>51</sup>    | DHCR7, CYP2R1, GC, CYP24A1                 | 562258/185057     | Fracture risk                            | 0.84 (0.70, 1.02)                          | 0.07         | per SD decrease of genetically determined 25OHD level              |

|                               |                                            |                                                                                                                        |                                                                                                                                                   |                                                                                                                                                                        |                                                              |                                                                |
|-------------------------------|--------------------------------------------|------------------------------------------------------------------------------------------------------------------------|---------------------------------------------------------------------------------------------------------------------------------------------------|------------------------------------------------------------------------------------------------------------------------------------------------------------------------|--------------------------------------------------------------|----------------------------------------------------------------|
| Jacobs 2020 <sup>52</sup>     | CYP2R1, DHCR7, CYP24A1, SEC23A, and AMDHD1 | 41 505/14 802                                                                                                          | Multiple sclerosis                                                                                                                                | 0.57 (0.41-0.81)                                                                                                                                                       | 0.00                                                         | 1 unit increase in the natural-log-transformed vitamin D level |
| Kämpe 2019 <sup>53</sup>      | GC and CYP2R1 (haplotype analyses)         | 648 children                                                                                                           | pQCT BMD<br>pQCT BMC<br>pQCT cross-sectional area<br>pQCT cortical density<br>pQCT cortical content                                               |                                                                                                                                                                        | 0.08<br>0.79<br>0.03<br>0.01<br>0.05                         | haplotype combination analysis*                                |
| Kwak 2019 <sup>54</sup>       | DHCR7, CYP2R1, GC, CYP24A1                 | 2 591 Korean adults                                                                                                    | SBP<br>DBP<br>hypertension                                                                                                                        | -0.42 (-1.51, 0.67)<br>0.001 (-0.67, 0.67)<br>1.04 (0.91, 1.19)                                                                                                        | 0.45<br>0.99<br>0.60                                         | unit change in polygenic risk score *                          |
| Chen 2019 <sup>13</sup>       | DHCR7, CYP2R1, GC, CYP24A1                 | 10 655 Chinese adults                                                                                                  | metabolic syndrome<br>Waist circumference<br>ln(triglycerides)<br>High-density lipoprotein<br>Systolic blood pressure<br>Diastolic blood pressure | 0.977 ( 0.966, 1.030)<br>0.403(-0.854, 1.659)<br>-0.026(-0.099, 0.047)<br>-0.010(-0.053, 0.033)<br>-0.198(-3.032, 2.637)<br>0.061(-1.776, 1.899)                       |                                                              | per 10 nmol/L increase of 25(OH) D levels                      |
| Meng 2019 <sup>15</sup>       | CYP2R1, DHCR7, CYP24A1, SEC23A, and AMDHD1 | 319 778<br>319 779<br>339 256/106 405<br>339 256/28 337<br>338 172<br>339 256/23 294<br>339 256/23 603<br>339 256/9830 | SBP<br>DBP<br>hypertension<br>Ischemic heart disease<br>BMI<br>Depression<br>non-vertebral fracture<br>All-cause mortality                        | -0.65 ( -1.53, 0.07)<br>-0.12 ( -0.36, 0.12)<br>0.97 (0.91,1.04)<br>1.02 (0.92,1.14)<br>0.13( -0.11,0.37)<br>0.91 (0.82,1.02 )<br>0.97 (0.87,1.08)<br>1.03 (0.87,1.22) | 0.21<br>0.66<br>0.34<br>0.65<br>0.33<br>0.09<br>0.50<br>0.67 | 1 SD increase of the log-transformed 25(OH)D level             |
| Milaneschi 2019 <sup>55</sup> | CYP2R1, DHCR7, CYP24A1, SEC23A, and AMDHD1 | 480 359/135 458                                                                                                        | Major depression                                                                                                                                  | 0.03 (-0.07,0.13)                                                                                                                                                      | 0.50                                                         | 1 unit increase in the natural-log-transformed vitamin D level |

|                                   |                                                |                                                |                                              |                                                           |              |                                                                          |
|-----------------------------------|------------------------------------------------|------------------------------------------------|----------------------------------------------|-----------------------------------------------------------|--------------|--------------------------------------------------------------------------|
| Huang 2019 <sup>56</sup>          | CYP2R1 and DHCR7                               | 99 012 Chinese adults<br>106 911 Danish adults | Cardiovascular disease                       | 1.01 (0.99, 1.02)                                         | 0.18         | 25 nmol/L increase in 25(OH)D concentrations                             |
|                                   |                                                |                                                | Myocardial infraction                        | 1.00 (0.97,1.03)                                          | 0.54         |                                                                          |
|                                   |                                                |                                                | Stroke                                       | 1.00 (0.99, 1.01)                                         | 0.68         |                                                                          |
|                                   |                                                |                                                | Ischemic stroke                              | 1.00 (0.98,1.02)                                          | 0.69         |                                                                          |
|                                   |                                                |                                                | Intracerebral hemorrhage                     | 1.01 (0.98,1.04)                                          | 0.86         |                                                                          |
|                                   |                                                |                                                | Ischemic heart disease                       | 1.00 (0.98-1.01)                                          | 0.54         |                                                                          |
| Liyanage 2020 <sup>34</sup>       | DHCR7, CYP2R1, GC, and CYP24A1                 | 36 077/12 874                                  | melanoma                                     | 1.06 (0.95-1.19)                                          |              | 20 nmol L-1 decrease in 25(OH)D                                          |
| Manousaki 2021 <sup>57</sup>      | 69 conditionally independent common 25OHD SNPs | 24 063/9358                                    | Type 1 diabetes                              | 1.09 (0.86-1.40)                                          | 0.48         | 29 nmol/L decrease in 25(OH)D                                            |
| Butler-Laporte 2020 <sup>58</sup> | 81 conditionally independent common 25OHD SNPs | 1 299 010/ 14 134                              | COVID-19 susceptibility                      | 0.97 (0.95-1.10)                                          | 0.60         | 1 SD increase of the log-transformed 25(OH)D level                       |
|                                   |                                                | 908,494/6 406                                  | COVID-19 hospitalization                     | 1.11 (0.91-1.35)                                          | 0.30         |                                                                          |
|                                   |                                                | 628 238/4 336                                  | COVID-19 severity                            | 0.93 (0.73-1.17)                                          | 0.53         |                                                                          |
| Amin 2020 <sup>59</sup>           | CYP2R1, DHCR7, CYP24A1, SEC23A, and AMDHD1     | 127 637 /11 181<br>7 268 /1 389                | COVID-19 susceptibility<br>COVID-19 severity | ln(OR) 0.17 (-0.22 - 0.57)<br>ln(OR)=0.36 ( -0.89 - 1.61) | 0.39<br>0.57 |                                                                          |
| Revez 2020 <sup>10</sup>          | 275 25OHD - Conditioned on BMI (mtCOJO)        |                                                | Allergic rhinitis                            | 0.03 (-0.02,0.09)                                         | 0.23         | per unit increase in rank-based inverse-normal transformed 25(OH)D level |
|                                   | 268 25OHD - No adjustment for BMI              |                                                | Allergic rhinitis                            | 0.04 (-0.02,0.09)                                         | 0.17         |                                                                          |
|                                   | 276 25OHD - With BMI covariate                 |                                                | Allergic rhinitis                            | 0.03 (-0.02,0.09)                                         | 0.21         |                                                                          |
|                                   | 242 25OHD - Conditioned on BMI (mtCOJO)        |                                                | Coronary Artery Disease                      | -0.02 (-0.06,0.02)                                        | 0.26         |                                                                          |
|                                   | 232 25OHD - No adjustment for BMI              |                                                | Coronary Artery Disease                      | -0.02 (-0.06,0.02)                                        | 0.26         |                                                                          |

|                                         |                            |                     |          |
|-----------------------------------------|----------------------------|---------------------|----------|
| 242 25OHD - With BMI covariate          | Coronary Artery Disease    | -0.02 (-0.05,0.02)  | 0.35     |
| 230 25OHD - Conditioned on BMI (mtCOJO) | Dyslipidemia               | -0.05 (-0.08,-0.01) | 0.01     |
| 220 25OHD - No adjustment for BMI       | Dyslipidemia               | -0.06 (-0.09,-0.02) | 1.16E-03 |
| 230 25OHD - With BMI covariate          | Dyslipidemia               | -0.04 (-0.08,-0.01) | 0.01     |
| 251 25OHD - Conditioned on BMI (mtCOJO) | Hypertension               | -0.01 (-0.05,0.02)  | 0.39     |
| 246 25OHD - No adjustment for BMI       | Hypertension               | -0.03 (-0.06,0.001) | 0.06     |
| 252 25OHD - With BMI covariate          | Hypertension               | -0.01 (-0.05,0.02)  | 0.41     |
| 276 25OHD - Conditioned on BMI (mtCOJO) | Inflammatory Bowel Disease | -0.08 (-0.18,0.03)  | 0.15     |
| 270 25OHD - No adjustment for BMI       | Inflammatory Bowel Disease | -0.08 (-0.19,0.02)  | 0.12     |
| 279 25OHD - With BMI covariate          | Inflammatory Bowel Disease | -0.07 (-0.18,0.03)  | 0.18     |
| 225 25OHD - Conditioned on BMI (mtCOJO) | Rheumatoid Arthritis       | 0.03 (-0.20,0.25)   | 0.82     |
| 218 25OHD - No adjustment for BMI       | Rheumatoid Arthritis       | -0.01 (-0.24,0.22)  | 0.93     |
| 223 25OHD - With BMI covariate          | Rheumatoid Arthritis       | 0.04 (-0.19,0.26)   | 0.76     |

*For details see the main text of the manuscript.*



## References

- 1 Manson, J. E. *et al.* Vitamin D Supplements and Prevention of Cancer and Cardiovascular Disease. *N Engl J Med* **380**, 33-44, doi:10.1056/NEJMoa1809944 (2019).
- 2 Scragg, R. *et al.* Monthly High-Dose Vitamin D Supplementation and Cancer Risk: A Post Hoc Analysis of the Vitamin D Assessment Randomized Clinical Trial. *JAMA Oncol* **4**, e182178, doi:10.1001/jamaoncol.2018.2178 (2018).
- 3 Pittas, A. G. *et al.* Vitamin D Supplementation and Prevention of Type 2 Diabetes. *N Engl J Med* **381**, 520-530, doi:10.1056/NEJMoa1900906 (2019).
- 4 Bischoff-Ferrari, H. A. *et al.* Effect of Vitamin D Supplementation, Omega-3 Fatty Acid Supplementation, or a Strength-Training Exercise Program on Clinical Outcomes in Older Adults: The DO-HEALTH Randomized Clinical Trial. *JAMA* **324**, 1855-1868, doi:10.1001/jama.2020.16909 (2020).
- 5 Burt, L. A. *et al.* Effect of High-Dose Vitamin D Supplementation on Volumetric Bone Density and Bone Strength: A Randomized Clinical Trial. *JAMA* **322**, 736-745, doi:10.1001/jama.2019.11889 (2019).
- 6 Billington, E. O. *et al.* Safety of High-Dose Vitamin D Supplementation: Secondary Analysis of a Randomized Controlled Trial. *J Clin Endocrinol Metab* **105**, doi:10.1210/clinem/dgz212 (2020).
- 7 Vimalaswaran, K. S. *et al.* Causal relationship between obesity and vitamin D status: bi-directional Mendelian randomization analysis of multiple cohorts. *PLoS medicine* **10**, e1001383, doi:10.1371/journal.pmed.1001383 (2013).
- 8 Bouillon, R. *et al.* Skeletal and Extraskeletal Actions of Vitamin D: Current Evidence and Outstanding Questions. *Endocr Rev* **40**, 1109-1151, doi:10.1210/er.2018-00126 (2019).
- 9 Manousaki, D. *et al.* Genome-wide Association Study for Vitamin D Levels Reveals 69 Independent Loci. *Am J Hum Genet* **106**, 327-337, doi:10.1016/j.ajhg.2020.01.017 (2020).
- 10 Revez, J. A. *et al.* Genome-wide association study identifies 143 loci associated with 25 hydroxyvitamin D concentration. *Nature communications* **11**, 1647, doi:10.1038/s41467-020-15421-7 (2020).
- 11 Ye, Z. *et al.* Association between circulating 25-hydroxyvitamin D and incident type 2 diabetes: a mendelian randomisation study. *The lancet. Diabetes & endocrinology* **3**, 35-42, doi:10.1016/S2213-8587(14)70184-6 (2015).
- 12 Lu, L. *et al.* Association of vitamin D with risk of type 2 diabetes: A Mendelian randomisation study in European and Chinese adults. *PLoS medicine* **15**, e1002566, doi:10.1371/journal.pmed.1002566 (2018).
- 13 Chen, C. *et al.* Association of 25-hydroxyvitamin D with cardiometabolic risk factors and metabolic syndrome: a mendelian randomization study. *Nutrition journal* **18**, 61, doi:10.1186/s12937-019-0494-7 (2019).
- 14 Yuan, S., Jiang, X., Michaelsson, K. & Larsson, S. C. Genetic Prediction of Serum 25-Hydroxyvitamin D, Calcium, and Parathyroid Hormone Levels in Relation to Development of Type 2 Diabetes: A Mendelian Randomization Study. *Diabetes Care* **42**, 2197-2203, doi:10.2337/dc19-1247 (2019).

- 15 Meng, X. *et al.* Phenome-wide Mendelian-randomization study of genetically determined vitamin D on multiple health outcomes using the UK Biobank study. *Int J Epidemiol* **48**, 1425-1434, doi:10.1093/ije/dyz182 (2019).
- 16 Wang, N. *et al.* Vitamin D, prediabetes and type 2 diabetes: bidirectional Mendelian randomization analysis. *European journal of nutrition* **59**, 1379-1388, doi:10.1007/s00394-019-01990-x (2020).
- 17 Revez, J. A. *et al.* Genome-wide association study identifies 143 loci associated with 25 hydroxyvitamin D concentration. *bioRxiv*, doi:<https://doi.org/10.1101/860767> (2019).
- 18 Scragg, R. The Vitamin D Assessment (ViDA) study - Design and main findings. *J Steroid Biochem Mol Biol* **198**, 105562, doi:10.1016/j.jsbmb.2019.105562 (2020).
- 19 Avenell, A. *et al.* Long-term follow-up for mortality and cancer in a randomized placebo-controlled trial of vitamin D(3) and/or calcium (RECORD trial). *J Clin Endocrinol Metab* **97**, 614-622, doi:10.1210/jc.2011-1309 (2012).
- 20 Wactawski-Wende, J. *et al.* Calcium plus vitamin D supplementation and the risk of colorectal cancer. *N Engl J Med* **354**, 684-696, doi:10.1056/NEJMoa055222 (2006).
- 21 Trivedi, D. P., Doll, R. & Khaw, K. T. Effect of four monthly oral vitamin D3 (cholecalciferol) supplementation on fractures and mortality in men and women living in the community: randomised double blind controlled trial. *BMJ* **326**, 469-472, doi:10.1136/bmj.326.7387.469  
326/7387/469 [pii] (2003).
- 22 Keum, N., Lee, D. H., Greenwood, D. C., Manson, J. E. & Giovannucci, E. Vitamin D supplementation and total cancer incidence and mortality: a meta-analysis of randomized controlled trials. *Annals of oncology : official journal of the European Society for Medical Oncology / ESMO* **30**, 733-743, doi:10.1093/annonc/mdz059 (2019).
- 23 Manson, J. E., Bassuk, S. S., Buring, J. E. & Group, V. R. Principal results of the VITamin D and OmegA-3 Trial (VITAL) and updated meta-analyses of relevant vitamin D trials. *J Steroid Biochem Mol Biol* **198**, 105522, doi:10.1016/j.jsbmb.2019.105522 (2020).
- 24 Ong, J. S. *et al.* Association of vitamin D levels and risk of ovarian cancer: a Mendelian randomization study. *Int J Epidemiol* **45**, 1619-1630, doi:10.1093/ije/dyw207 (2016).
- 25 Theodoratou, E. *et al.* Instrumental variable estimation of the causal effect of plasma 25-hydroxy-vitamin D on colorectal cancer risk: a mendelian randomization analysis. *PLoS One* **7**, e37662, doi:10.1371/journal.pone.0037662 (2012).
- 26 Dudding, T. *et al.* Assessing the causal association between 25-hydroxyvitamin D and the risk of oral and oropharyngeal cancer using Mendelian randomization. *Int J Cancer* **143**, 1029-1036, doi:10.1002/ijc.31377 (2018).
- 27 Chandler, P. D. *et al.* Association between Vitamin D Genetic Risk Score and Cancer Risk in a Large Cohort of U.S. Women. *Nutrients* **10**, doi:10.3390/nu10010055 (2018).
- 28 Dimitrakopoulou, V. I. *et al.* Circulating vitamin D concentration and risk of seven cancers: Mendelian randomisation study. *BMJ* **359**, j4761, doi:10.1136/bmj.j4761 (2017).

- 29 Sun, Y. Q. *et al.* Serum 25-hydroxyvitamin D levels and risk of lung cancer and histologic types: a Mendelian randomisation analysis of the HUNT study. *The European respiratory journal : official journal of the European Society for Clinical Respiratory Physiology* **51**, doi:10.1183/13993003.00329-2018 (2018).
- 30 Ong, J. S. *et al.* Vitamin D and overall cancer risk and cancer mortality: a Mendelian randomization study. *Hum Mol Genet* **27**, 4315-4322, doi:10.1093/hmg/ddy307 (2018).
- 31 He, Y. *et al.* Exploring causality in the association between circulating 25-hydroxyvitamin D and colorectal cancer risk: a large Mendelian randomisation study. *BMC Med* **16**, 142, doi:10.1186/s12916-018-1119-2 (2018).
- 32 Winslow, U. C., Nordestgaard, B. G. & Afzal, S. High plasma 25-hydroxyvitamin D and high risk of nonmelanoma skin cancer: a Mendelian randomization study of 97 849 individuals. *Br J Dermatol* **178**, 1388-1395, doi:10.1111/bjd.16127 (2018).
- 33 Dong, J. *et al.* No Association Between Vitamin D Status and Risk of Barrett's Esophagus or Esophageal Adenocarcinoma: A Mendelian Randomization Study. *Clin Gastroenterol Hepatol* **17**, 2227-2235 e2221, doi:10.1016/j.cgh.2019.01.041 (2019).
- 34 Liyanage, U. E. *et al.* Is there a causal relationship between vitamin D and melanoma risk? A Mendelian randomization study. *Br J Dermatol* **182**, 97-103, doi:10.1111/bjd.18238 (2020).
- 35 Jiang, X. *et al.* Circulating vitamin D concentrations and risk of breast and prostate cancer: a Mendelian randomization study. *Int J Epidemiol* **48**, 1416-1424, doi:10.1093/ije/dyy284 (2019).
- 36 Vimalaswaran, K. S. *et al.* Association of vitamin D status with arterial blood pressure and hypertension risk: a mendelian randomisation study. *The lancet. Diabetes & endocrinology* **2**, 719-729, doi:10.1016/S2213-8587(14)70113-5 (2014).
- 37 Manousaki, D., Mokry, L. E., Ross, S., Goltzman, D. & Richards, J. B. Mendelian Randomization Studies Do Not Support a Role for Vitamin D in Coronary Artery Disease. *Circulation. Cardiovascular genetics* **9**, 349-356, doi:10.1161/CIRCGENETICS.116.001396 (2016).
- 38 Afzal, S., Brondum-Jacobsen, P., Bojesen, S. E. & Nordestgaard, B. G. Genetically low vitamin D concentrations and increased mortality: Mendelian randomisation analysis in three large cohorts. *BMJ* **349**, g6330, doi:10.1136/bmj.g6330 (2014).
- 39 Li, S. S. *et al.* Genetically Low Vitamin D Levels, Bone Mineral Density, and Bone Metabolism Markers: a Mendelian Randomisation Study. *Scientific reports* **6**, 33202, doi:10.1038/srep33202 (2016).
- 40 Hysinger, E. B. *et al.* Mendelian randomization analysis demonstrates that low vitamin D is unlikely causative for pediatric asthma. *J Allergy Clin Immunol* **138**, 1747-1749 e1744, doi:10.1016/j.jaci.2016.06.056 (2016).
- 41 Ooi, E. M., Afzal, S. & Nordestgaard, B. G. Elevated remnant cholesterol in 25-hydroxyvitamin D deficiency in the general population: Mendelian randomization study. *Circulation. Cardiovascular genetics* **7**, 650-658, doi:10.1161/CIRCGENETICS.113.000416 (2014).
- 42 Larsson, S. C., Melhus, H. & Michaelsson, K. Circulating Serum 25-Hydroxyvitamin D Levels and Bone Mineral Density: Mendelian Randomization Study. *J Bone Miner Res* **33**, 840-844, doi:10.1002/jbmr.3389 (2018).
- 43 Sun, J. Y. *et al.* Circulating serum vitamin D levels and total body bone mineral density: A Mendelian randomization study. *J Cell Mol Med* **23**, 2268-2271, doi:10.1111/jcmm.14153 (2019).

- 44 Aspelund, T. *et al.* Effect of Genetically Low 25-Hydroxyvitamin D on Mortality Risk: Mendelian Randomization Analysis in 3 Large European Cohorts. *Nutrients* **11**, doi:10.3390/nu11010074 (2019).
- 45 Gianfrancesco, M. A. *et al.* Evidence for a causal relationship between low vitamin D, high BMI, and pediatric-onset MS. *Neurology* **88**, 1623-1629, doi:10.1212/WNL.0000000000003849 (2017).
- 46 Manousaki, D. *et al.* Vitamin D levels and susceptibility to asthma, elevated immunoglobulin E levels, and atopic dermatitis: A Mendelian randomization study. *PLoS medicine* **14**, e1002294, doi:10.1371/journal.pmed.1002294 (2017).
- 47 Bae, S. C. & Lee, Y. H. Vitamin D level and risk of systemic lupus erythematosus and rheumatoid arthritis: a Mendelian randomization. *Clin Rheumatol* **37**, 2415-2421, doi:10.1007/s10067-018-4152-9 (2018).
- 48 Magnus, M. C. *et al.* Vitamin D and risk of pregnancy related hypertensive disorders: mendelian randomisation study. *BMJ* **361**, k2167, doi:10.1136/bmj.k2167 (2018).
- 49 Lund-Nielsen, J. *et al.* Vitamin D and Inflammatory Bowel Disease: Mendelian Randomization Analyses in the Copenhagen Studies and UK Biobank. *J Clin Endocrinol Metab* **103**, 3267-3277, doi:10.1210/jc.2018-00250 (2018).
- 50 Mai, X. M. *et al.* Potential causal associations of serum 25-hydroxyvitamin D with lipids: a Mendelian randomization approach of the HUNT study. *Eur J Epidemiol* **34**, 57-66, doi:10.1007/s10654-018-0465-x (2019).
- 51 Trajanoska, K. *et al.* Assessment of the genetic and clinical determinants of fracture risk: genome wide association and mendelian randomisation study. *BMJ* **362**, k3225, doi:10.1136/bmj.k3225 (2018).
- 52 Jacobs, B. M., Noyce, A. J., Giovannoni, G. & Dobson, R. BMI and low vitamin D are causal factors for multiple sclerosis: A Mendelian Randomization study. *Neurol Neuroimmunol Neuroinflamm* **7**, doi:10.1212/NXI.0000000000000662 (2020).
- 53 Kampe, A. *et al.* Genetic variation in GC and CYP2R1 affects 25-hydroxyvitamin D concentration and skeletal parameters: A genome-wide association study in 24-month-old Finnish children. *PLoS Genet* **15**, e1008530, doi:10.1371/journal.pgen.1008530 (2019).
- 54 Kwak, S. Y., Cho, Y., Oh, H. & Shin, M. J. Association of circulating 25-hydroxyvitamin D levels with hypertension and blood pressure values in Korean adults: A Mendelian randomization study on a subset of the Korea National Health and Nutrition Survey 2011-2012 population. *Nutr Res Pract* **13**, 498-508, doi:10.4162/nrp.2019.13.6.498 (2019).
- 55 Milaneschi, Y. *et al.* A role for vitamin D and omega-3 fatty acids in major depression? An exploration using genomics. *Transl Psychiatry* **9**, 219, doi:10.1038/s41398-019-0554-y (2019).
- 56 Huang, T. *et al.* Vitamin D and cause-specific vascular disease and mortality: a Mendelian randomisation study involving 99,012 Chinese and 106,911 European adults. *BMC Med* **17**, 160, doi:10.1186/s12916-019-1401-y (2019).
- 57 Manousaki, D. *et al.* Vitamin D levels and risk of type 1 diabetes: A Mendelian randomization study. *PLoS medicine* **18**, e1003536, doi:10.1371/journal.pmed.1003536 (2021).
- 58 Butler-Laporte G. *et al.* Vitamin D and COVID-19 susceptibility and severity in the COVID-19 Host Genetics Initiative: A Mendelian randomization study. *medRxiv preprint*, doi:<https://doi.org/10.1101/2020.09.08.20190975> (2020).

- 59 Amin, H. & Drenos, F. No evidence that vitamin D is able to prevent or affect the severity of COVID-19 in individuals with European ancestry: a Mendelian randomisation study of open data. *BMJ Nutr Prev Health* **published online**, doi:10.1136/bmjnp-2020-000151 (2021).
